# Supplementary material for: Application of hollow porous molecularly imprinted polymers using K2Ti4O9 coupled with SPE-HPLC for the determination of celecoxib in human urine samples: optimization by central composite design (CCD)
Source: Royal Society of Chemistry journal article supplement (doi:10.1039/c7ay00547d), 2017-01-01
Supplement: c7ay00547d1.pdf [file c7ay00547d1.pdf]

# Application of hollow porous molecularly imprinted polymer using K<sub>2</sub>Ti<sub>4</sub>O<sub>9</sub> coupled with SPE-HPLC for the determination of celecoxib in human urine samples: Optimization by Central Composite Design (CCD)

---

**Saeedeh Ansari \***

Department of Chemistry, Saveh Branch, Islamic Azad University, Saveh, Iran

[ansarisaeedeh@gmail.com](mailto:ansarisaeedeh@gmail.com)

\* Corresponding author E-mail address: [ansarisaeedeh@gmail.com](mailto:ansarisaeedeh@gmail.com) (Saeedeh Ansari)

**Figure captions:**

**Fig. S1.** Chemical structures of (A) KH-570, (B) MAA, (C) AIBN, (D) acetic acid, (E) EGDMA and (F) methanol.

**Fig. S2.** Chemical structures of (A) celecoxib, (B) valdecoxib and (C) sumatriptan.

**Fig. S3.** Adsorption capacity of HPMIPs and HPNIPs with different molar ratio between template, functional monomer and cross-linker.

**Fig. S4.** Effect of elute solvent on the adsorption of celecoxib using HPMIP and HPNIP.

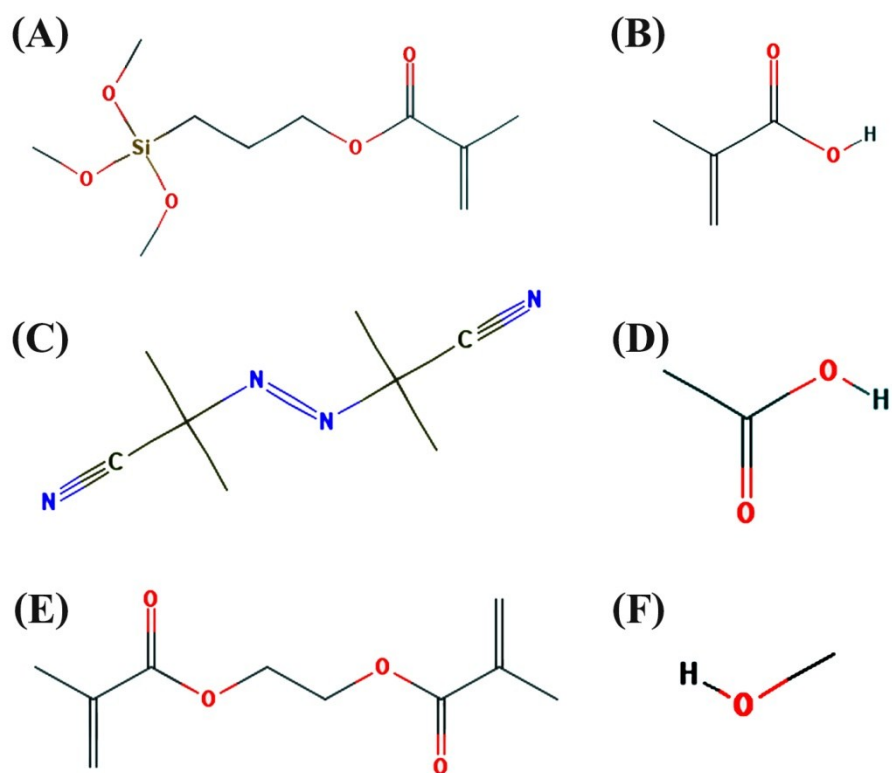

**Fig. S1.** Chemical structures of (A) KH-570, (B) MAA, (C) AIBN, (D) acetic acid, (E) EGDMA and (F) methanol.

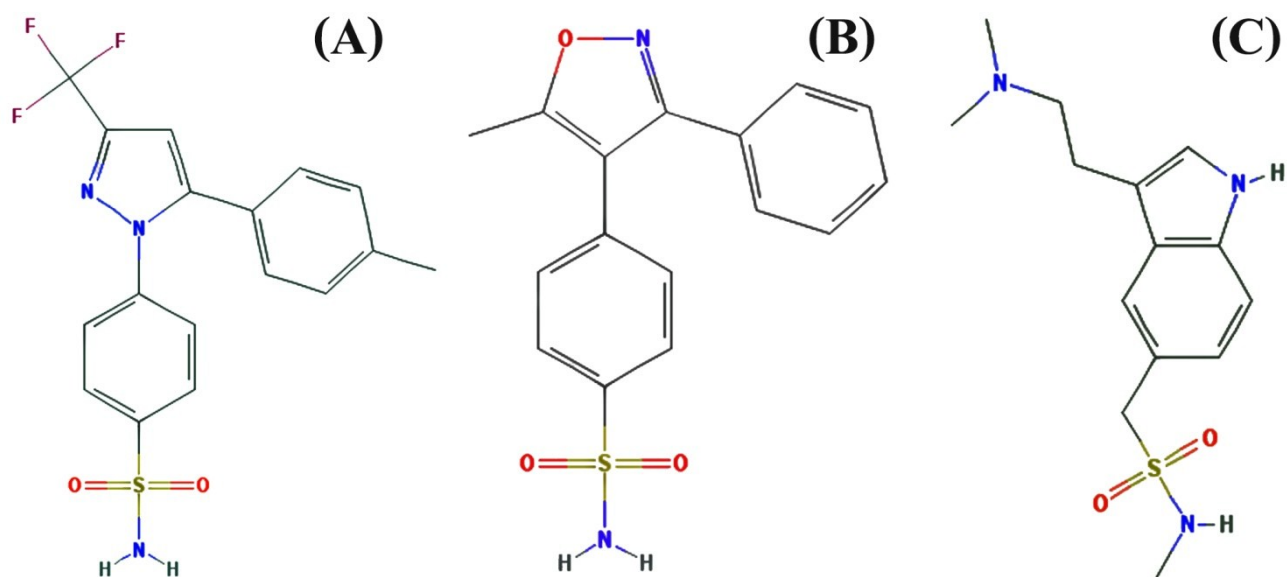

**Fig. S2.** Chemical structures of (A) celecoxib, (B) valdecoxib and (C) sumatriptan.

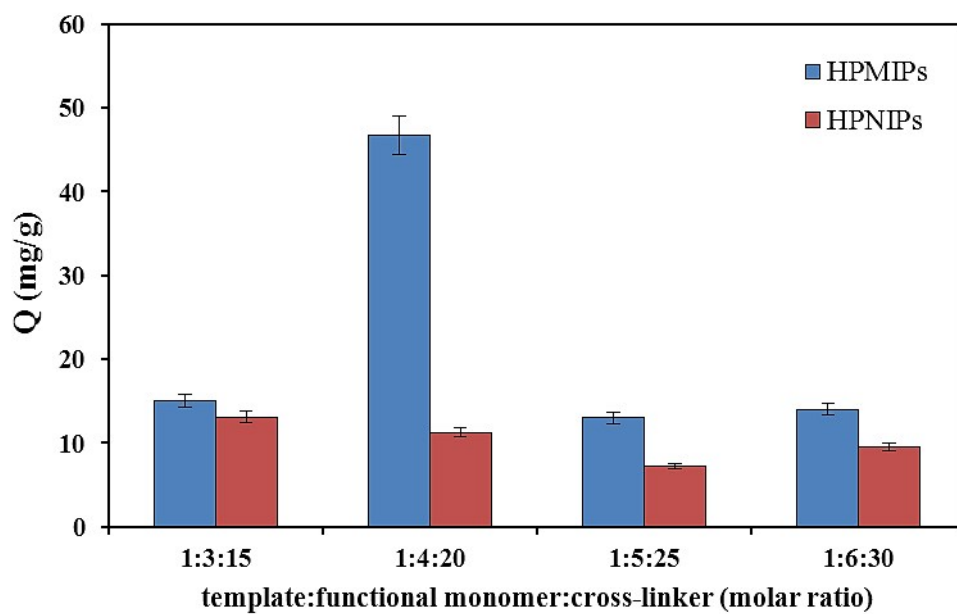

**Fig. S3.** Adsorption capacity of HPMIPs and HPNIPs with different molar ratio between template, functional monomer and cross-linker.

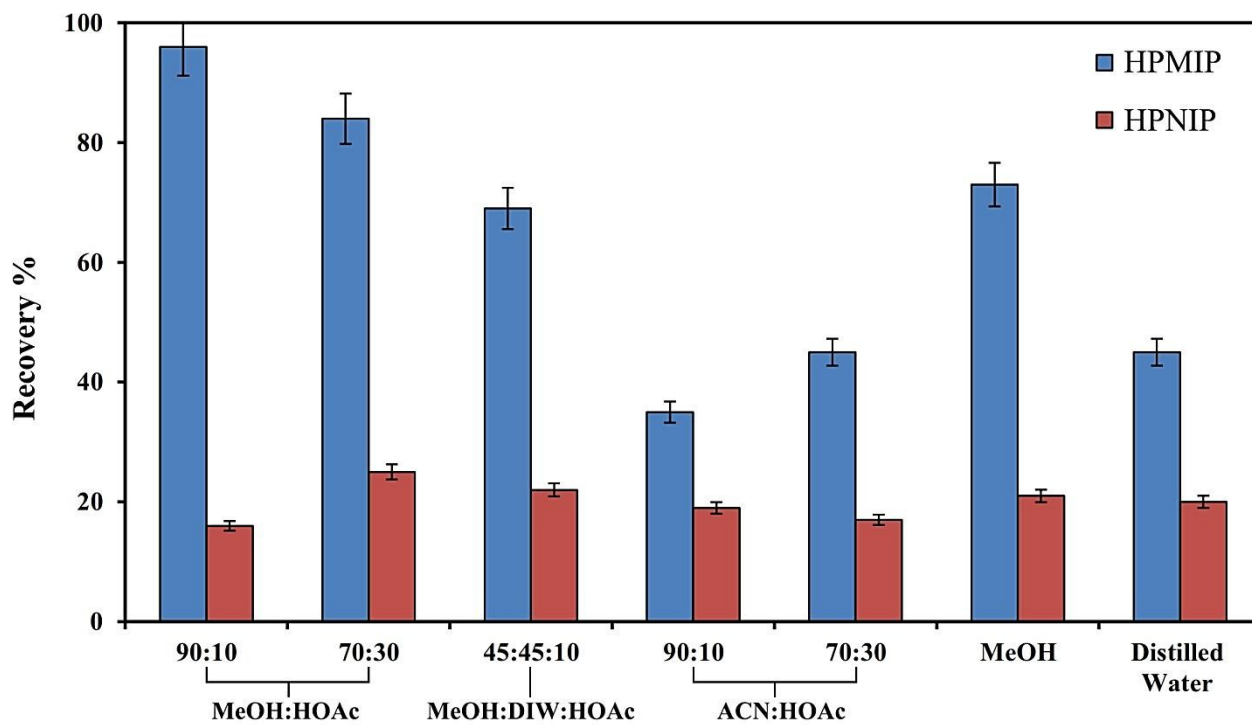

**Fig. S4.** Effect of elute solvent on the adsorption of celecoxib using HPMIP and HPNIP.
